# Supplementary material for: Adenovirus DNA Polymerase Loses Fidelity on a Stretch of Eleven Homocytidines during Pre-GMP Vaccine Preparation
Source: MDPI journal article supplement (doi:10.3390/vaccines10060960), 2022-06-16
Supplement: s1 [file s1]

### DHFR-C11-Pk

ATGATCAGTCTGATTGCGGCGTTAGCGGTAGATCGCGTTATCGGCATGGAAAACGCCATGCCGTGGAACCTGCCTGC  
CGATCTCGCCTGGTTTAAACGCAACACCTTAAATAAACCCGTGATTATGGGCCGCCATACCTGGGAATCAATCGGTTCG  
TCCGTTGCCAGGACGCAAAAAATATTATCCTCAGCAGTCAACCGGGTACGGACGATCGCGTAACGTGGGTGAAGTCGG  
TGGATGAAGCCATCGCGGCGTGTGGTGACGTACCAGAAATCATGGTGATTGGCGGCGGTTCGCGTTTATGAACAGTTC  
TTGCCAAAAGCGCAAAAACTGTATCTGACGCATATCGACGCAGAAAGTGAAGGCGACACCCATTTCCCGGATTACGA  
GCCGGATGACTGGGAATCGGTATTACGCGAATTCCACGATGCTGATGCGCAGAACTCTCACAGCTATTGCTTTGAGAT  
TCTGGAGCGGCGGGAGCCCAGCGCCCCCCCCCATCGTGCAGAACATCCCAACCCCCTGCTGGGCTGGACGTAC  
CCATACGATGTTCCAGATTACGCTGGAACAAAACTCATCTCAGAAGAGGATCTGTAA

### DHFR-C12-Myc

ATGATCAGTCTGATTGCGGCGTTAGCGGTAGATCGCGTTATCGGCATGGAAAACGCCATGCCGTGGAACCTGCCTGC  
CGATCTCGCCTGGTTTAAACGCAACACCTTAAATAAACCCGTGATTATGGGCCGCCATACCTGGGAATCAATCGGTTCG  
TCCGTTGCCAGGACGCAAAAAATATTATCCTCAGCAGTCAACCGGGTACGGACGATCGCGTAACGTGGGTGAAGTCGG  
TGGATGAAGCCATCGCGGCGTGTGGTGACGTACCAGAAATCATGGTGATTGGCGGCGGTTCGCGTTTATGAACAGTTC  
TTGCCAAAAGCGCAAAAACTGTATCTGACGCATATCGACGCAGAAAGTGAAGGCGACACCCATTTCCCGGATTACGA  
GCCGGATGACTGGGAATCGGTATTACGCGAATTCCACGATGCTGATGCGCAGAACTCTCACAGCTATTGCTTTGAGAT  
TCTGGAGCGGCGGGAGCCCAGCGCCCCCCCCCATCGTGCAGAACATCCCAACCCCCTGCTGGGCCTGGACGTAC  
CCATACGATGTTCCAGATTACGCTGGAACAAAACTCATCTCAGAAGAGGATCTGTAA

### DHFR-C13-HA

ATGATCAGTCTGATTGCGGCGTTAGCGGTAGATCGCGTTATCGGCATGGAAAACGCCATGCCGTGGAACCTGCCTGC  
CGATCTCGCCTGGTTTAAACGCAACACCTTAAATAAACCCGTGATTATGGGCCGCCATACCTGGGAATCAATCGGTTCG  
TCCGTTGCCAGGACGCAAAAAATATTATCCTCAGCAGTCAACCGGGTACGGACGATCGCGTAACGTGGGTGAAGTCGG  
TGGATGAAGCCATCGCGGCGTGTGGTGACGTACCAGAAATCATGGTGATTGGCGGCGGTTCGCGTTTATGAACAGTTC  
TTGCCAAAAGCGCAAAAACTGTATCTGACGCATATCGACGCAGAAAGTGAAGGCGACACCCATTTCCCGGATTACGA  
GCCGGATGACTGGGAATCGGTATTACGCGAATTCCACGATGCTGATGCGCAGAACTCTCACAGCTATTGCTTTGAGAT  
TCTGGAGCGGCGGGAGCCCAGCGCCCCCCCCCATCGTGCAGAACATCCCAACCCCCTGCTGGGCCTGGACGTAC  
CCATACGATGTTCCAGATTACGCTGGAACAAAACTCATCTCAGAAGAGGATCTGTAA

(a)

| INPUT         | DHFR-C11-Pk                                                                                                                                                                                                                                                                                                                                         | DHFR-C12-Myc                                                                                                                                                                                                                                                                                                                                   | DHFR-C13-HA                                                                                                                                                                                                                                                                                                                                   |
|---------------|-----------------------------------------------------------------------------------------------------------------------------------------------------------------------------------------------------------------------------------------------------------------------------------------------------------------------------------------------------|------------------------------------------------------------------------------------------------------------------------------------------------------------------------------------------------------------------------------------------------------------------------------------------------------------------------------------------------|-----------------------------------------------------------------------------------------------------------------------------------------------------------------------------------------------------------------------------------------------------------------------------------------------------------------------------------------------|
| No addition   | <b>11 C's</b><br><b>198 aa</b><br><b>22.39 kDa</b><br>MISLIAALAVDRVIGMENAM<br>PWNLPADLAWFKRNTLNKP<br>VIMGRHTWESIGRPLPGRKN<br>IILSSQPGTDDRVTWVKSVD<br>AIAACGDVPEIMVIGGGRVYE<br>QFLPKAQKLYLTHIDAEVEGD<br>THFPDYEPDDWESVFSEFHD<br>ADAQNSHSYCFEILERREPSA<br><b>PPP</b> IVQNI <b>PNPLLGLD</b> VPIRCS<br>RLRWKNKSSQKRI                                    | <b>12 C's</b><br><b>199 aa</b><br><b>22.43 kDa</b><br>MISLIAALAVDRVIGMENAM<br>PWNLPADLAWFKRNTLNKP<br>VIMGRHTWESIGRPLPGRKN<br>IILSSQPGTDDRVTWVKSVD<br>AIAACGDVPEIMVIGGGRVYE<br>QFLPKAQKLYLTHIDAEVEGD<br>THFPDYEPDDWESVFSEFHD<br>ADAQNSHSYCFEILERREPSA<br><b>PPP</b> HRAEHPQPPAGPGRTH<br>MFQITL <b>EQKLISEEDL</b>                                | <b>13 C's</b><br><b>199 aa</b><br><b>22.43 kDa</b><br>MISLIAALAVDRVIGMENAM<br>PWNLPADLAWFKRNTLNKP<br>VIMGRHTWESIGRPLPGRKN<br>IILSSQPGTDDRVTWVKSVD<br>AIAACGDVPEIMVIGGGRVYE<br>QFLPKAQKLYLTHIDAEVEGD<br>THFPDYEPDDWESVFSEFHD<br>ADAQNSHSYCFEILERREPSA<br><b>PPP</b> PSCRTSPTPCWAWT <b>TPY</b><br><b>DVPDYA</b> GTKTHLRGS                       |
| One C added   | <b>12 C's</b><br><b>207 aa</b><br><b>23.34 kDa</b><br>MISLIAALAVDRVIGMENAM<br>PWNLPADLAWFKRNTLNKP<br>VIMGRHTWESIGRPLPGRKN<br>IILSSQPGTDDRVTWVKSVD<br>AIAACGDVPEIMVIGGGRVYE<br>QFLPKAQKLYLTHIDAEVEGD<br>THFPDYEPDDWESVFSEFHD<br>ADAQNSHSYCFEILERREPSA<br><b>PPP</b> HRAEHPQPPAGPGRTH<br>MFQITL <b>EQKLISEEDL</b> MRIPG<br>LE                         | <b>13 C's</b><br><b>208 aa</b><br><b>23.44 kDa</b><br>MISLIAALAVDRVIGMENAM<br>PWNLPADLAWFKRNTLNKP<br>VIMGRHTWESIGRPLPGRKN<br>IILSSQPGTDDRVTWVKSVD<br>AIAACGDVPEIMVIGGGRVYE<br>QFLPKAQKLYLTHIDAEVEGD<br>THFPDYEPDDWESVFSEFHD<br>ADAQNSHSYCFEILERREPSA<br><b>PPP</b> PSCRTSPTPCWAWT <b>TPY</b><br><b>DVPDYA</b> GTKTHLRGSVMRI<br>PGILE           | <b>14 C's</b><br><b>208 aa</b><br><b>23.51 kDa</b><br>MISLIAALAVDRVIGMENAM<br>PWNLPADLAWFKRNTLNKP<br>VIMGRHTWESIGRPLPGRKN<br>IILSSQPGTDDRVTWVKSVD<br>AIAACGDVPEIMVIGGGRVYE<br>QFLPKAQKLYLTHIDAEVEGD<br>THFPDYEPDDWESVFSEFHD<br>ADAQNSHSYCFEILERREPSA<br><b>PPP</b> PIVQNI <b>PNPLLGLD</b> VPIRC<br>SRLRWKNKSSQKRILMRIPG<br>LE                 |
| Two C's added | <b>13 C's</b><br><b>223 aa</b><br><b>25.24 kDa</b><br>MISLIAALAVDRVIGMENAM<br>PWNLPADLAWFKRNTLNKP<br>VIMGRHTWESIGRPLPGRKN<br>IILSSQPGTDDRVTWVKSVD<br>AIAACGDVPEIMVIGGGRVYE<br>QFLPKAQKLYLTHIDAEVEGD<br>THFPDYEPDDWESVFSEFHD<br>ADAQNSHSYCFEILERREPSA<br><b>PPP</b> PSCRTSPTPCWAWT <b>TPY</b><br><b>DVPDYA</b> GTKTHLRGSNEDP<br>GNSRVRLTCRRPLIKVVRPR | <b>14 C's</b><br><b>224 aa</b><br><b>25.40 kDa</b><br>MISLIAALAVDRVIGMENAM<br>PWNLPADLAWFKRNTLNKP<br>VIMGRHTWESIGRPLPGRKN<br>IILSSQPGTDDRVTWVKSVD<br>AIAACGDVPEIMVIGGGRVYE<br>QFLPKAQKLYLTHIDAEVEGD<br>THFPDYEPDDWESVFSEFHD<br>ADAQNSHSYCFEILERREPSA<br><b>PPP</b> PIVQNI <b>PNPLLGLD</b> VPIRC<br>SRLRWKNKSSQKRICNEDPG<br>NSRVRLTCRRPLIKVVRPR | <b>15 C's</b><br><b>224 aa</b><br><b>25.34 kDa</b><br>MISLIAALAVDRVIGMENAM<br>PWNLPADLAWFKRNTLNKP<br>VIMGRHTWESIGRPLPGRKN<br>IILSSQPGTDDRVTWVKSVD<br>AIAACGDVPEIMVIGGGRVYE<br>QFLPKAQKLYLTHIDAEVEGD<br>THFPDYEPDDWESVFSEFHD<br>ADAQNSHSYCFEILERREPSA<br><b>PPP</b> HRAEHPQPPAGPGRTH<br>TMFQITL <b>EQKLISEEDL</b> NEDP<br>GNSRVRLTCRRPLIKVVRPR |

(b)

**Supplementary Figure S1.** Open reading frames and their predicted protein products used in the *in vitro* transcription/translation assay. Homocytidine runs are shown in bold. (a) Open reading frames of the input plasmids containing 11-, 12- and 13- cytidine runs. (b) The predicted translated products of the three input plasmids and their derivatives with one or two additional cytidines in the homocytidine run. DHFR - dihydrofolate reductase. Amino acids of the Pk (also known as SV5 – IPNPLLGLD), Myc (EQKLISEEDL) and HA (YDVPDYA) tags are colour coded. The homocytidine stretch is highlighted (yellow box).
